# Supplementary material for: Concomitant ion matrix effects in SCGD-OES enhanced with formic acid
Source: Royal Society of Chemistry journal article supplement (doi:10.1039/d3ja00372h), 2024-01-01
Supplement: d3ja00372h1.pdf [file d3ja00372h1.pdf]

## Concomitant ion matrix effects in SCGD-OES enhanced with formic acid.

Yinchenxi Zhang<sup>a</sup>, Jaime Orejas<sup>a\*</sup>, Jorge Pisonero<sup>a\*</sup> and Nerea Bordel<sup>a</sup>

<sup>a</sup>: Grupo de Espectroscopía, Láseres y Plasmas (GELP), Department of Physics, University of Oviedo, C/ Gonzalo Gutierrez Quiros S/N, Mieres 33600, Spain

Corresponding author: [orejasjaime@uniovi.es](mailto:orejasjaime@uniovi.es); [pisonerojorge@uniovi.es](mailto:pisonerojorge@uniovi.es)

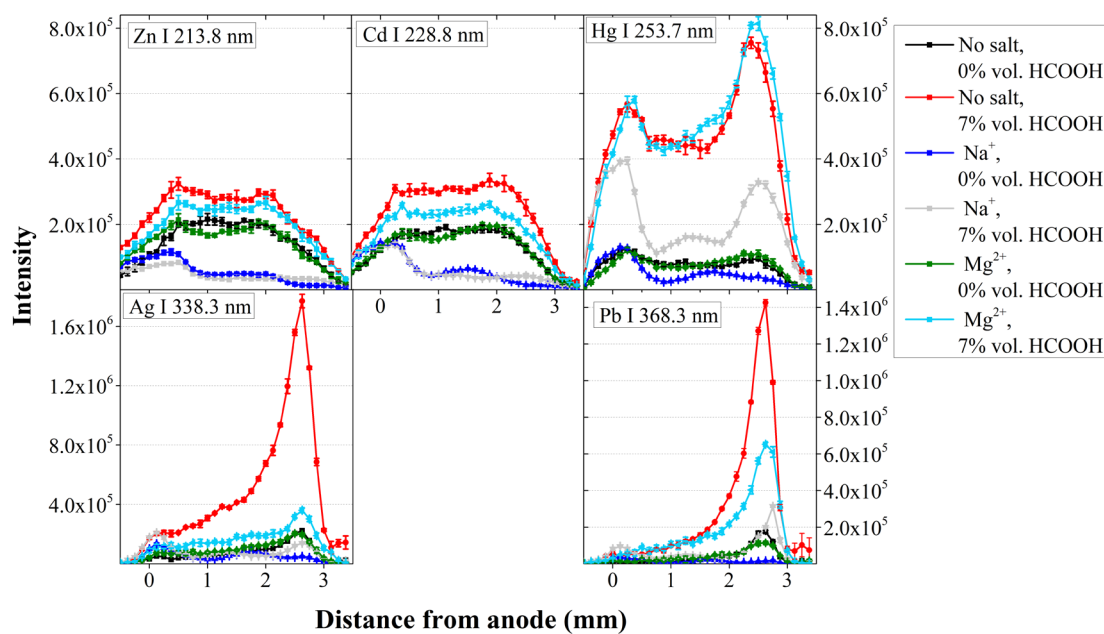

**Fig.S1** HCOOH influence on CVG-prone elemental emission signal spatially resolved pattern, from 0.5 mm above the tungsten anode to 0.5 mm below the solution surface

Table S1: The reduction potential for dissolved CVG-prone elements

| Reaction                                                 | Reduction Potential (V) |
|----------------------------------------------------------|-------------------------|
| $\text{Li}^+ + \text{e}^- \rightarrow \text{Li}$         | -3.04 V                 |
| $\text{Sr}^{2+} + 2\text{e}^- \rightarrow \text{Sr}$     | -2.90 V                 |
| $\text{Na}^+ + \text{e}^- \rightarrow \text{Na}$         | -2.71 V                 |
| $\text{Mg}^{2+} + 2\text{e}^- \rightarrow \text{Mg}$     | -2.37 V                 |
| $\text{Zn}^{2+} + 2\text{e}^- \rightarrow \text{Zn}$     | -0.76 V                 |
| $\text{Fe}^{2+} + 2\text{e}^- \rightarrow \text{Fe}$     | -0.45 V                 |
| $\text{Cd}^{2+} + 2\text{e}^- \rightarrow \text{Cd}$     | -0.40 V                 |
| $\text{In}^{3+} + 3\text{e}^- \rightarrow \text{In}$     | -0.34 V                 |
| $\text{Pb}^{2+} + 2\text{e}^- \rightarrow \text{Pb}$     | -0.13 V                 |
| $\text{Fe}^{3+} + 3\text{e}^- \rightarrow \text{Fe}$     | -0.04 V                 |
| $\text{Fe}^{3+} + \text{e}^- \rightarrow \text{Fe}^{2+}$ | 0.77 V                  |
| $\text{Ag}^+ + \text{e}^- \rightarrow \text{Ag}$         | 0.80 V                  |
| $\text{Hg}^{2+} + 2\text{e}^- \rightarrow \text{Hg}$     | 0.85 V                  |
